# Supplementary material
Source: publisher figshare collection journal article supplement (https://f1000.figshare.com/ndownloader/files/1264277)
Supplement: Supplementary file 1 [file 1264277]

Subject ID	DRUG (mg)	ADJUST	Age	Sex	MMSE0 score	BPRS-T0 score	BPRS-P0 score	PDQ0 score	BDI0 score	HDRS score	CGIMDo/a0 score	INS0 score	HYPIN0 score	SEADLS0 score (%)	BlindKB	BlindPt.
102	0	n	77	f	23	37	7	66	15	19	5	10	2	60	olanz.	pla
105	0	n	77	f	25			47	2	0	3	1	2	85	pla	olanz.
106	0	n	76	m	30	25	6	19	5	2	3	1	2	90	2.5	pla
110	0	y	60	m	30	39	9	100	21	16	5	6	2	60	2.5	olanz.
113	0	n	72	f	27	35	8	64	5	7	4	0	0		2.5	pla
117	0	n	67	m	28	29	7	23	10	5	3	4	0	95	2.5	olanz.
118	0	n	65	m	26	31	8	32	13	9	4	11	1	85	2.5	olanz.
122	0	n	69	m	27	42	12	61	13	11	5	3	3	80	pla	pla
123	0	n	79	m	22	40	6	66	7	9	5	2	2	55	2.5	olanz.
107	2.5	y	68	f	23	35	6	60	15	5	3	1	4	70	2.5	olanz.
111	2.5	n	59	f	30	31	7	65	8	3	3	6	1	98	5	olanz.
112	2.5	y	69	f	30	31	8	78	8	6	3	6	2	50	2.5	olanz.
115	2.5	n	68	f	29	28	7	30	0	7	2	5	2	95	5	olanz
121	2.5	n	81	m	26	42	14	63	17	4	5	2	5	40	5	olanz.
124	2.5	n	79	m	22	39	12	56	11	7	3	4	0	80	5	olanz
103	5	n	67	f	30	36	9	85	13	25	4	8	3	70	olanz.	olanz.
104	5	n	76	m	25			80	18	9	4	2	3	45	olanz.	olanz.
108	5	n	76	f	24	30	10			6	3				5	olanz
109	5	n	72	f	25	35	7	51	4	8	5	1	1	75	2.5	olanz.
114	5	y	67	m	30	32	4	7	0	9	3	1	1	100	pla	pla
116	5	n	67	f	30	36	8	70	15	22	3	3	0	85	2.5	olanz.
119	5	n	79	m	25	36	10	74	28	10	5	0	6	75	2.5	olanz.
120	5	n	75	m	25	29	7	44	10	4	4	3	4	75	2.5	olanz.
101	10	n	61	m	28	40	8	71	4	19	5	0	2	40	olanz.	olanz.
